# Supplementary material for: Organometallic ionic liquids from alkyloctamethylferrocenium cations: thermal properties, crystal structures, and magnetic properties
Source: Royal Society of Chemistry journal article supplement (doi:10.1039/c3dt00084b), 2013-01-01
Supplement: c3dt00084b.pdf [file c3dt00084b.pdf]

Electronic Supplementary Information

## Organometallic Ionic Liquids from Octamethylferrocenium Cations: Preparation, Thermal Properties, Crystal Structures, and Magnetic Properties

Yusuke Funasako,<sup>a</sup> Takashi Inagaki,<sup>a</sup> Tomoyuki Mochida,<sup>\*a</sup> Toshihiro Sakurai,<sup>b</sup> Hitoshi Ohta,<sup>c</sup> Ko Furukawa<sup>d</sup> and Toshikazu Nakamura<sup>d</sup>

<sup>a</sup>Department of Chemistry, Graduate School of Science, Kobe University, Rokkodai, Nada, Hyogo 657-8501, Japan

<sup>b</sup>Center for Supports to Research and Education Activities, Kobe University, Rokkodai, Nada, Hyogo 657-8501, Japan

<sup>c</sup>Molecular Photoscience Research Center, Kobe University, Rokkodai, Nada, Hyogo 657-8501, Japan

<sup>d</sup>Institute for Molecular Science, Myodaiji, Okazaki, Aichi 444-8585, Japan

### 1. Preparation of alkyloctamethylferrocenes

Alkyloctamethylferrocenes were prepared in a similar manner to that described for propyloctamethylferrocene in the text, and the data are shown below.

**Pentyloctamethylferrocene:** a) 1-Hydroxypentyloctamethylferrocene. Yellow-orange solid, 72.6% yield. b) Pentyloctamethylferrocene. Yellow oil, 64.5% yield. <sup>1</sup>H NMR (400 MHz, CDCl<sub>3</sub>, TMS):  $\delta$  = 0.88 (t, 3H,  $J$  = 6.8 Hz), 1.29 (br, 6H), 1.63–1.70 (br, 24H), 2.14 (s, 2H), 3.23 (s, 1H). Anal. Calcd (%) for C<sub>23</sub>H<sub>36</sub>Fe (368.4): C, 74.99; H, 9.85. Found: C, 74.58; H, 9.96. **Hexyloctamethylferrocene:** a) 1-Hydroxyhexyloctamethylferrocene. Yellow solid, 90% yield. <sup>1</sup>H NMR (400 MHz, CDCl<sub>3</sub>, TMS):  $\delta$  = 0.87 (t, 3H,  $J$  = 6.8 Hz), 1.26 (br, 6H), 1.43 (br, 2H), 1.65–1.76 (m, 21H), 1.90 (s, 3H), 2.31 (s, 1H), 3.55 (s, 1H), 4.40 (br, 1H). b) Hexyloctamethylferrocene. Yellow oil, 90% yield. <sup>1</sup>H NMR (400 MHz, CDCl<sub>3</sub>, TMS):  $\delta$  = 0.87 (t, 3H,  $J$  = 6.8 Hz), 1.29 (br, 8H), 1.65 (s, 6H), 1.73 (m, 18H), 2.17 (t, 2H,  $J$  = 7.2 Hz), 3.20 (s, 1H). Anal. Calcd (%) for C<sub>24</sub>H<sub>38</sub>Fe (382.4): C, 75.38; H, 10.02. Found: C, 75.39; H, 10.13. **Octyloctamethylferrocene:** a)

1-Hydroxyoctyloctamethylferrocene. Yellow solid, 76.5% yield.  $^1\text{H}$  NMR (400 MHz,  $\text{CDCl}_3$ , TMS):  $\delta = 0.88$  (t, 3H,  $J = 6.8$  Hz), 1.25 (br, 8H), 1.43 (br, 2H), 1.68–1.76 (m, 21H), 1.89 (s, 3H), 2.31 (s, 1H), 3.55 (s, 1H), 4.35 (br, 1H). b) Octyloctamethylferrocene. Yellow oil, 83% yield.  $^1\text{H}$  NMR (400 MHz,  $\text{CDCl}_3$ , TMS):  $\delta = 0.88$  (t, 3H,  $J = 6.8$  Hz), 1.26 (br, 12H), 1.66 (s, 6H), 1.73 (m, 18H), 2.18 (br, 2H), 3.21 (s, 1H). Anal. Calcd (%) for  $\text{C}_{26}\text{H}_{42}\text{Fe}$  (382.4): C, 76.08; H, 10.31. Found: C, 76.01; H, 10.32. **Decyloctamethylferrocene:** a) 1-Hydroxydecyloctamethylferrocene. Yellow oil.  $^1\text{H}$  NMR (400 MHz,  $\text{CDCl}_3$ , TMS):  $\delta = 0.89$  (t, 4.3H,  $J = 6.2$  Hz), 1.26 (br, 18H), 1.43 (br, 2H), 1.69–1.76 (m, 21H), 1.89 (s, 3H), 2.31 (s, 1H), 3.55 (s, 1H), 4.35 (br, 1H). The crude product was used for the next step without purification. b) Decyloctamethylferrocene. Yellow oil.  $^1\text{H}$  NMR (400 MHz,  $\text{CDCl}_3$ , TMS):  $\delta = 0.88$  (t, 4.4H,  $J = 6.8$  Hz), 1.26 (br, 22H), 1.68 (s, 6H), 1.73 (m, 18H), 2.18 (t, 2H,  $J = 7.4$  Hz), 3.20 (s, 1H). The crude product was used for the salt preparation without purification. **Dodecyloctamethylferrocene:** a) 1-Hydroxydodecyloctamethylferrocene. Yellow solid, 48.5% yield (crude). The crude product was used for the next step without purification. b) Dodecyloctamethylferrocene. Yellow oil, 71% yield (crude).  $^1\text{H}$  NMR (400 MHz,  $\text{CDCl}_3$ , TMS):  $\delta = 0.88$  (t, 3.4H,  $J = 6.8$  Hz), 1.25 (br, 22H), 1.63–1.70 (m, 24H), 2.14 (br, 2H), 3.22 (s, 1H). The crude product was used for the salt preparation without purification. **Heptadecyloctamethylferrocene:** a) 1-Hydroxyheptadecyloctamethylferrocene. Yellow solid. The crude product was used for the next step without purification. b) Heptadecyloctamethylferrocene. Yellow oil. The crude product was used for the salt preparation without purification. **trans-1-Pentenyloctamethylferrocene:** 1-Hydroxypentenyloctamethylferrocene (0.531 g), prepared similarly, was distilled under vacuum at 130 °C to give the product within an hour as a dark-brown oil (0.268 g, 53%).  $^1\text{H}$  NMR (400 MHz,  $\text{CDCl}_3$ , TMS):  $\delta = 0.94$  (m, 3H), 1.47 (m, 2H), 1.65 (s, 6H), 1.70 (s, 6H), 1.77 (s, 6H), 1.86 (s, 6H), 2.11 (m, 2H), 3.55 (s, 1H), 5.87 (m, 1H), 6.04 (d, 1H,  $J = 16.0$  Hz). Anal. Calcd (%) for  $\text{C}_{23}\text{H}_{34}\text{Fe}$  (354.4): C, 75.40; H, 9.35. Found: C, 75.34; H, 9.44.

## 2. Thermal behavior of [C5Fc][Tf<sub>2</sub>N]

The DSC trace of [C5Fc][Tf<sub>2</sub>N] is shown in Figure S1. When cooled from the melt, crystallization occurred at around  $-2.3$  °C to give phase I, and with further cooling, a phase transition to phase II occurred at around  $-11.5$  °C ( $\Delta S = 44.2$  J K<sup>-1</sup> mol<sup>-1</sup>). In the heating run, phase I melted at  $20.2$  °C (Figure S1c), but an unprecedented, exothermic transition to phase III often occurred (Figures S1a and S1b). In the heating run, a transition from phase II to III occurred at  $-8.5$  °C (Figure S1a). In the run shown in Figure S1b, a transition from phase II to I occurred at  $0.4$  °C, followed by an exothermic transition to phase III, which melted at  $30.0$  °C.

## 3. Figures

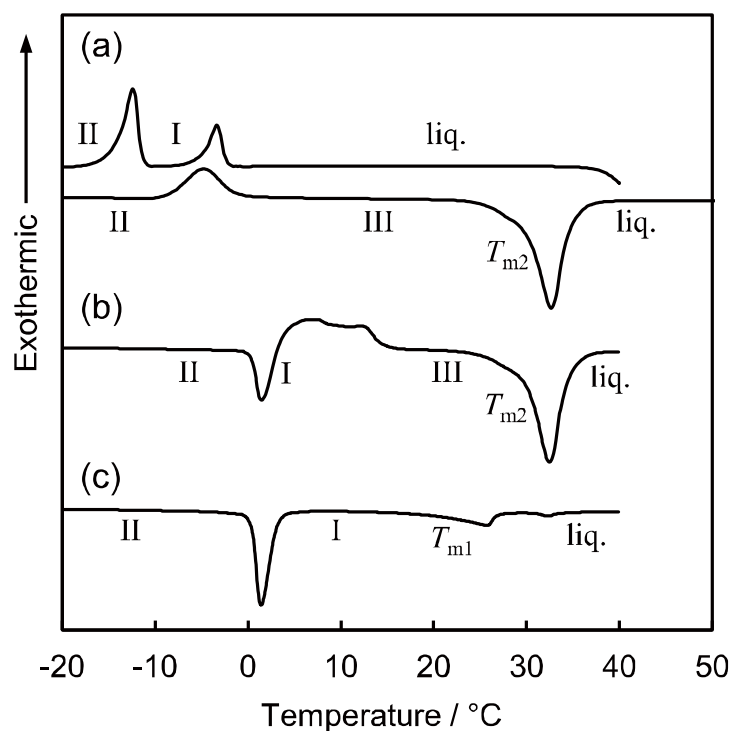

**Fig. S1** DSC traces of [pentyloctamethylferrocenium][Tf<sub>2</sub>N] ([C5Fc][Tf<sub>2</sub>N]) measured at 10 °C min<sup>-1</sup>. Only the heating runs are shown in (b) and (c).

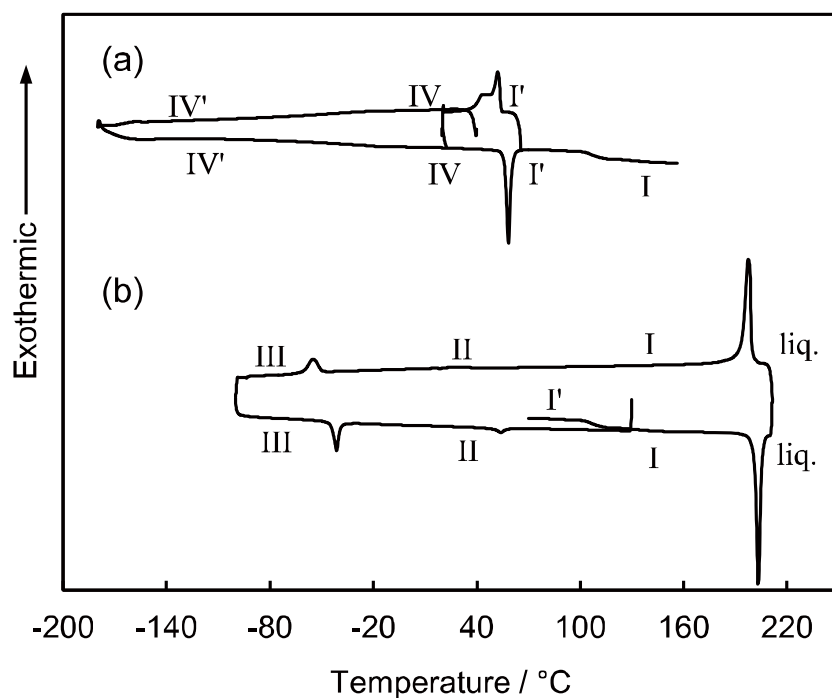

**Fig. S2** DSC traces of [decyloctamethylferrocenium][PF<sub>6</sub>] ([C10Fc][PF<sub>6</sub>]) measured at 10 °C min<sup>-1</sup>. Cycles (a) before and (b) after experiencing glass transition from phase I' to phase I are shown.

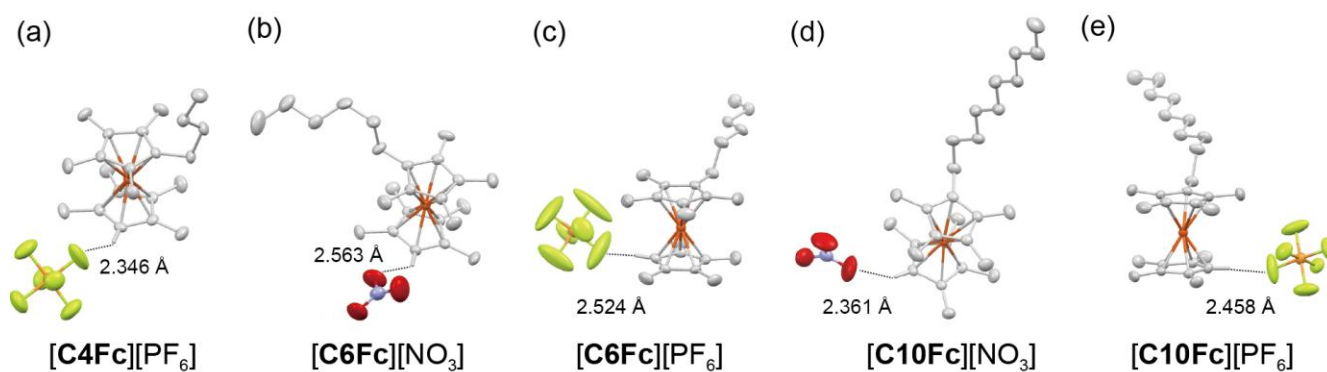

**Fig. S3** Molecular structures of (a) [C4Fc][PF<sub>6</sub>], (b) [C6Fc][NO<sub>3</sub>], (c) [C6Fc][PF<sub>6</sub>], (d) [C10Fc][NO<sub>3</sub>], and (e) [C10Fc][PF<sub>6</sub>]. C–H...X contacts are indicated by dotted lines.

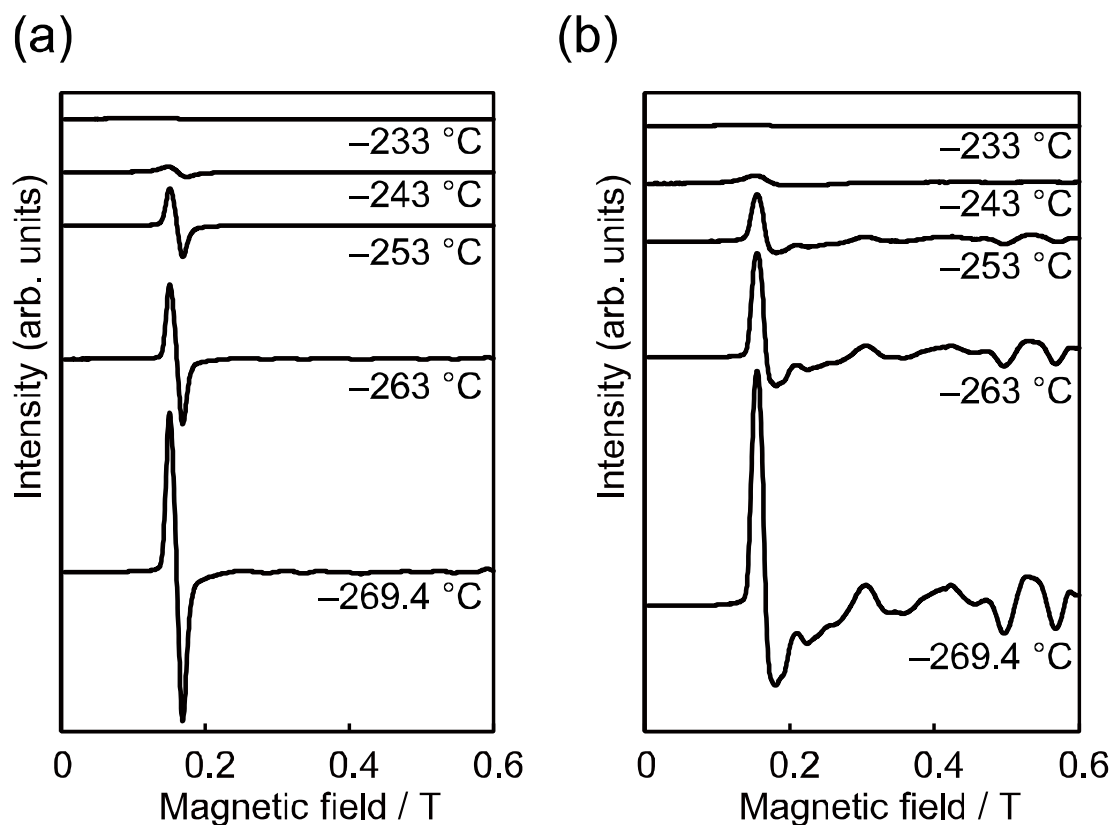

**Fig. S4** Temperature dependences of ESR spectra of  $[\text{C4Fc}][\text{Tf}_2\text{N}]$  crystallized (a) under a magnetic field of 0.8 T and (b) without a magnetic field.

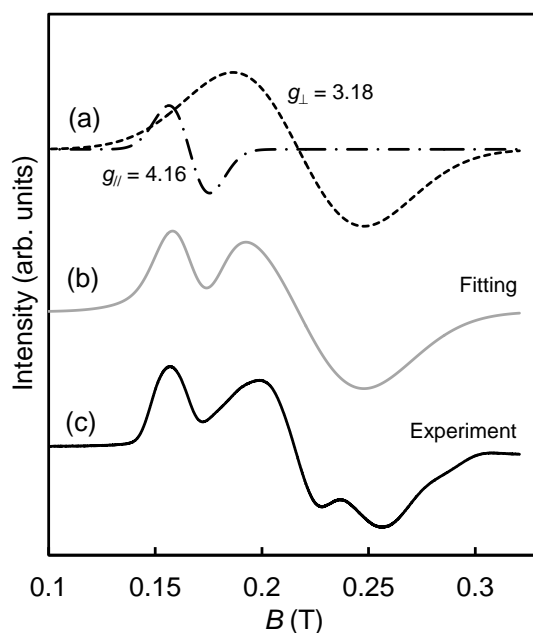

**Fig. S5** (a) ESR spectra of  $[\text{C4Fc}][\text{Tf}_2\text{N}]$  crystallized under a magnetic field of 0.8 T recorded at  $-269.4\text{ °C}$  ( $\theta = 50^\circ$ ). (b), (c) Simulated spectra (dotted line: oriented component; broken line: nonoriented component).

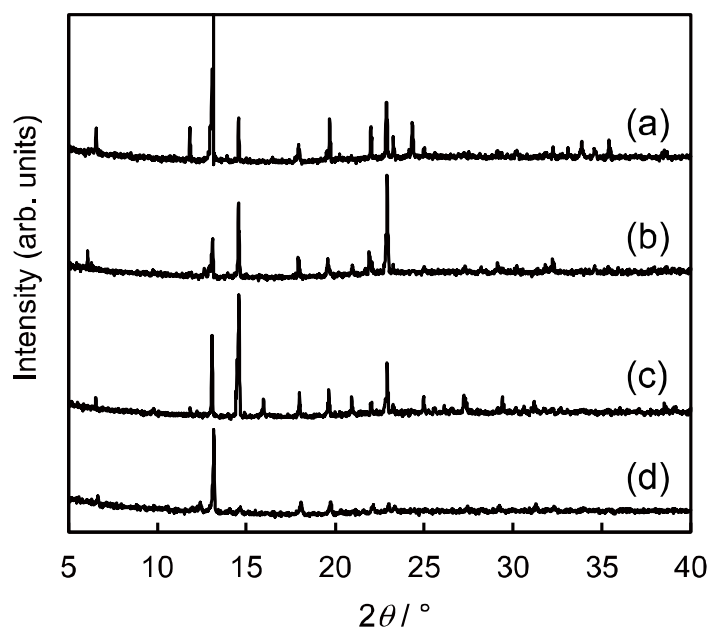

**Fig. S6** Powder XRD patterns of [C4Fc][Tf<sub>2</sub>N] crystallized under a magnetic field of 0.36 T (a–c) and without a magnetic field (d).

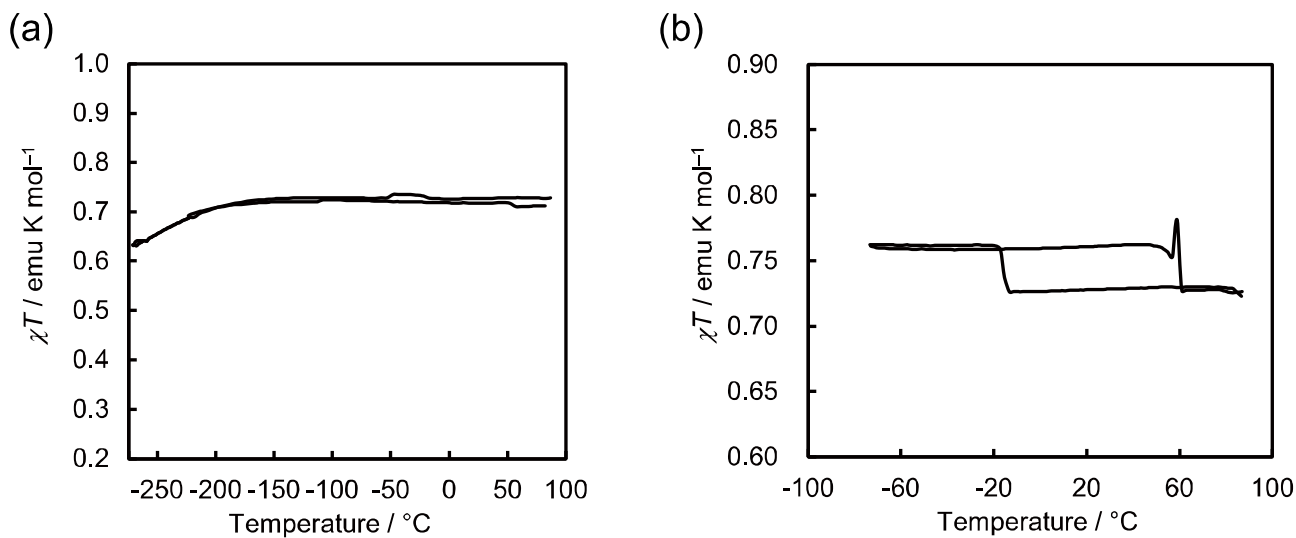

**Fig. S7** Temperature dependences of magnetic susceptibilities of [C5'Fc][Tf<sub>2</sub>N] measured under (a) 0.1 T and (b) 2 T at a scan rate of 2 °C min<sup>-1</sup>.
